# Supplementary material for: Effects of Three-Month Administration of High-Saturated Fat Diet and High-Polyunsaturated Fat Diets with Different Linoleic Acid (LA, C18:2n–6) to α-Linolenic Acid (ALA, C18:3n–3) Ratio on the Mouse Liver Proteome
Source: MDPI journal article supplement (doi:10.3390/nu13051678), 2021-05-15
Supplement: s1 [file s1]

**Table S2.** List of reference and target genes investigated in the analysis.

| Gene Symbol  | Gene Name                  | Sequence Accession Number | Primer Sequence (5' → 3')   | Start | Stop | Amplicon Length [bp] | Exon Junction               |
|--------------|----------------------------|---------------------------|-----------------------------|-------|------|----------------------|-----------------------------|
| <i>B2m</i>   | beta-2 microglobulin       | NM_009735.3               | Fvd: CCCGCCTCACATTGAAATCC   | 204   | 223  | 208                  | 397/398<br>(reverse primer) |
|              |                            |                           | Rvs: TCACATGTCTCGATCCCAGT   | 411   | 392  |                      |                             |
| <i>Ppia</i>  | peptidylprolyl isomerase A | NM_008907.2               | Fvd: GTCTCCTTCGAGCTGTTTGC   | 102   | 121  | 150                  | 113/114<br>(forward primer) |
|              |                            |                           | Rvs: GCGTGTAAGTCACCACCCT    | 251   | 232  |                      |                             |
| <i>Gak</i>   | cyclin G associated kinase | NM_153569.2               | Fvd: TTGTAAAGGACAGCTGGTGGAG | 507   | 528  | 134                  | 514/515<br>(forward primer) |
|              |                            |                           | Rvs: TGATGGGTGGTTTCTGCCTG   | 640   | 621  |                      |                             |
| <i>Oat</i>   | ornithine aminotransferase | NM_016978.2               | Fvd: GGCGGTTTATACCCTGTGTCT  | 1026  | 1046 | 99                   | 1040/1041 (starter<br>Fvd)  |
|              |                            |                           | Rvs: TAGTGGGTTTCCGCCGTATG   | 1124  | 1105 |                      |                             |
| <i>Prdx6</i> | peroxiredoxin 6            | NM_001303408.1            | Fvd: TTTCTGGGAGATTCCTGCTGA  | 175   | 196  | 63                   | 189/190<br>(starter Fvd)    |
|              |                            |                           | Rvs: GTTGGCTTGGCCTTGAAGTTAG | 237   | 216  |                      |                             |
