# Supplementary material for: Effects of Three-Month Administration of High-Saturated Fat Diet and High-Polyunsaturated Fat Diets with Different Linoleic Acid (LA, C18:2n–6) to α-Linolenic Acid (ALA, C18:3n–3) Ratio on the Mouse Liver Proteome
Source: MDPI journal article supplement (doi:10.3390/nu13051678), 2021-05-15
Supplement: s1 [file s1]

**Table S1.** List of immunoblot antibodies.

| Target Protein                                   | UniProtKB<br>Accession<br>Number | Gene<br>Symbol | Molecular<br>Weight | Dilution | Host<br>Species | Conjugate                                                                               | Company                               | Code Number |
|--------------------------------------------------|----------------------------------|----------------|---------------------|----------|-----------------|-----------------------------------------------------------------------------------------|---------------------------------------|-------------|
| Primary antibody                                 |                                  |                |                     |          |                 |                                                                                         |                                       |             |
| ornithine<br>aminotransferase                    | P29758                           | Oat            | 49 kDa              | 1:500    | mouse           | monoclonal                                                                              | Santa Cruz Biotechnology,<br>Inc      | sc-376050   |
| GAPDH                                            | P00355                           | GAPDH          | 36 kDa              | 1:10000  | rabbit          | polyclonal                                                                              | Abcam plc                             | ab190304    |
| peroxiredoxin 6                                  | P30041                           | PRDX6          | 25 kDa              | 1:400    | mouse           | monoclonal                                                                              | Santa Cruz Biotechnology,<br>Inc.     | sc-101522   |
| Secondary antibody                               |                                  |                |                     |          |                 |                                                                                         |                                       |             |
| m-IgGκ BP-HRP                                    |                                  |                |                     |          | mouse           | IgGκ light chain<br>binding protein<br>conjugated to<br>horseradish<br>peroxidase (HRP) | Santa Cruz Biotechnology,<br>Inc.     | sc-516102   |
| Peroxidase AffiniPure Goat Anti-Rabbit IgG (H+L) |                                  |                |                     |          | goat            | polyclonal,<br>horseradish<br>peroxidase (HRP)<br>conjugates                            | Jackson ImmunoResearch<br>Europe Ltd. | 111-035-003 |
